# Supplementary material for: Hope as a Trojan Horse in Sadness and Fear Regulation: Evidence for Emotion Self-Induction as a Regulatory Process
Source: Research Square preprint supplement (doi:10.21203/rs.3.rs-8288465/v1), 2025-12-22
Supplement: Supplementary file 1 [file 4a040ed2cc91601f37e656ad.docx]

**Data Analyses Supplement**

To address potential concerns regarding sample size and to reinforce confidence in the reliability of our significant results, we conducted robustness analyses using four complementary methodologies. These approaches—Jackknife, bootstrap, Multiverse, and split-half replicability analyses—focused on our key test statistics, including proportions and correlations. Together, they provide converging evidence that our findings reflect genuine effects.

1. **Jackknife (leave-one-out).** Recomputation of the statistic omitting one participant at a time to gauge sensitivity and bias (McIntosh, 2016).
2. **Bootstrap (10.000).** Resample of participants with replacement to estimate sampling variability and percentile CIs.
3. **Multiverse (100 versions).** Following the multiverse logic to assess researcher degrees of freedom (Steegen et al., 2016; Simonsohn et al., 2020), controlled perturbations of the input data were implemented as a complementary sensitivity check, conceptually related to distributional robustness ideas in statistical learning (Blanchet et al., 2024). Concretely, for continuous and paired-difference outcomes, only zero mean Gaussian noise (SD = .15*SD) was added; for ordinal outcomes, perturbations were applied that preserved the 5-point scale order and emotion valence. Responses were probabilistically jittered (−1/0/+1 with probabilities .20/.60/.2 bounded within the scale), while emotion tokens were substituted within the same valence set (e.g., joy to hope; sadness to fear). For two-item constructs (e.g., PESIN), perturbations were applied before computing the subject-wise maximum to avoid artificial inflation. Within each valence, a fixed a priori order was imposed, and local ±1 jitter was applied to preserve semantic proximity. In summary, our approach combines the multiverse logic (Steegen et al., 2016; Simonsohn et al., 2020) with perturbation-based sensitivity checks conceptually inspired by distributional robustness frameworks in statistical learning (Blanchet et al., 2024), while differing in that our perturbations targeted moderate variations in survey data rather than adversarial worst-case shifts. Although not standardized in psychometric literature, these ranges were pragmatically chosen to capture realistic variability in survey responses. This provides a stringent and transparent test of whether our findings remain stable under plausible variations in data quality and distributional assumptions.
4. **Split-half replicability (200 splits).** Repeatedly random split of the sample in half and recomputation of the statistic in each half to quantify consistency across subsamples (e.g., Koul et al., 2018; Kharabian Masouleh et al., 2019).

**Supplementary Tables**

**Table S1**

*Comparisons of the prevalence of emotion pairings used to regulate sadness, fear, shame, and guilt.*

| **Regulated Emotion** | **Pairing Comparison** | ***p*** | **Effect size** | **Effect type** |
| --- | --- | --- | --- | --- |
| **SADNESS** (N=126) | Hope vs Joy | **.012** | .29 | *AKP* |
|  | Hope vs Happiness | **.001** | .32 | *AKP* |
|  | Hope vs Relief | **< .001** | .48 | *AKP* |
|  | Hope vs Anger | **< .001** | .66 | *AKP* |
|  | Hope vs Satisfaction | **< .001** | .56 | *AKP* |
|  | Hope vs Curiosity | **< .001** | .57 | *AKP* |
|  | Hope vs Envy | **< .001** | .59 | *AKP* |
|  | Hope vs Pride | **< .001** | .71 | *AKP* |
|  | Hope vs Disgust | **< .001** | .82 | *AKP* |
|  | Hope vs Disdain | **< .001** | .90 | *AKP* |
|  | Hope vs None | **< .001** | .94 | *AKP* |
|  | Joy vs Happiness | .995 | .12 | *dz* |
|  | Joy vs Relief | .327 | .19 | *AKP* |
|  | Joy vs Anger | .075 | .32 | *AKP* |
|  | Joy vs Satisfaction | .**027** | .24 | *AKP* |
|  | Joy vs Curiosity | **.004** | .30 | *AKP* |
|  | Joy vs Envy | **.003** | .30 | *AKP* |
|  | Joy vs Pride | **< .001** | .32 | *AKP* |
|  | Joy vs Disgust | **< .001** | .45 | *AKP* |
|  | Joy vs Disdain | **< .001** | .46 | *AKP* |
|  | Joy vs None | **< .001** | .46 | *AKP* |
|  | Happiness vs Relief | .928 | .08 | *AKP* |
|  | Happiness vs Anger | .508 | .20 | *AKP* |
|  | Happiness vs Satisfaction | .256 | .10 | *AKP* |
|  | Happiness vs Curiosity | .053 | .15 | *AKP* |
|  | Happiness vs Envy | **.036** | .19 | *AKP* |
|  | Happiness vs Pride | **.004** | .17 | *AKP* |
|  | Happiness vs Disgust | **.001** | .34 | *AKP* |
|  | Happiness vs Disdain | **< .001** | .35 | *AKP* |
|  | Happiness vs None | **< .001** | .35 | *AKP* |
|  | Relief vs Anger | 1.000 | .08 | *AKP* |
|  | Relief vs Satisfaction | .986 | .11 | *dz* |
|  | Relief vs Curiosity | .706 | .19 | *dz* |
|  | Relief vs Envy | .612 | .02 | *AKP* |
|  | Relief vs Pride | .146 | .10 | *AKP* |
|  | Relief vs Disgust | **.036** | .15 | *AKP* |
|  | Relief vs Disdain | **.008** | .19 | *AKP* |
|  | Relief vs none | **.006** | .19 | *AKP* |
|  | Anger vs Satisfaction | 1.000 | .06 | *AKP* |
|  | Anger vs Curiosity | .986 | .04 | *AKP* |
|  | Anger vs Envy | .965 | .04 | *AKP* |
|  | Anger vs Pride | .508 | .04 | *AKP* |
|  | Anger vs Disgust | .194 | .33 | *dz* |
|  | Anger vs Disdain | .053 | .43 | *dz* |
|  | Anger vs None | **.036** | .10 | *AKP* |
|  | Satisfaction vs Curiosity | 1.000 | .06 | *AKP* |
|  | Satisfaction vs Envy | .999 | .10 | *dz* |
|  | Satisfaction vs Pride | .796 | .20 | *dz* |
|  | Satisfaction vs Disgust | .413 | .02 | *AKP* |
|  | Satisfaction vs Disdain | .146 | .04 | *AKP* |
|  | Satisfaction vs None | .104 | .04 | *AKP* |
|  | Curiosity vs Envy | 1.000 | .02 | *dz* |
|  | Curiosity vs Pride | .995 | .11 | *dz* |
|  | Curiosity vs Disgust | .868 | .17 | *dz* |
|  | Curiosity vs Disdain | .508 | .26 | *dz* |
|  | Curiosity vs None | .413 | .28 | *dz* |
|  | Envy vs Pride | .999 | .09 | *dz* |
|  | Envy vs Disgust | .928 | .16 | *dz* |
|  | Envy vs Disdain | .612 | .24 | *dz* |
|  | Envy vs None | .508 | .27 | *dz* |
|  | Pride vs Disgust | 1.000 | .07 | *dz* |
|  | Pride vs Disdain | .986 | .15 | *dz* |
|  | Pride vs None | .965 | .18 | *dz* |
|  | Disgust vs Disdain | 1.000 | .13 | *dz* |
|  | Disgust vs None | 1.000 | .11 | *dz* |
|  | Disdain vs None | 1.000 | .02 | *dz* |
| **FEAR** (N=126) | Hope vs Curiosity | .117 | .22 | *AKP* |
|  | Hope vs Relief | **.035** | .22 | *AKP* |
|  | Hope vs Pride | **.001** | .32 | *AKP* |
|  | Hope vs Joy | **< .001** | .35 | *AKP* |
|  | Hope vs Anger | **< .001** | .46 | *AKP* |
|  | Hope vs Happiness | **< .001** | .37 | *AKP* |
|  | Hope vs Satisfaction | **< .001** | .30 | *AKP* |
|  | Hope vs Envy | **< .001** | .38 | *AKP* |
|  | Hope vs None | **< .001** | .52 | *AKP* |
|  | Hope vs Disdain | **< .001** | .46 | *AKP* |
|  | Hope vs Disgust | **< .001** | .48 | *AKP* |
|  | Curiosity vs Relief | 1.000 | .04 | *dz* |
|  | Curiosity vs Pride | .825 | .06 | *AKP* |
|  | Curiosity vs Joy | .504 | .06 | *AKP* |
|  | Curiosity vs Anger | .160 | .14 | *AKP* |
|  | Curiosity vs Happiness | .117 | .15 | *AKP* |
|  | Curiosity vs Satisfaction | .117 | .04 | *AKP* |
|  | Curiosity vs Envy | **.035** | .10 | *AKP* |
|  | Curiosity vs None | **.010** | .22 | *AKP* |
|  | Curiosity vs Disdain | **.001** | .17 | *AKP* |
|  | Curiosity vs Disgust | **< .001** | .19 | *AKP* |
|  | Relief vs Pride | .975 | .06 | *AKP* |
|  | Relief vs Joy | .825 | .04 | *AKP* |
|  | Relief vs Anger | .407 | .12 | *AKP* |
|  | Relief vs Happiness | .300 | .02 | *AKP* |
|  | Relief vs Satisfaction | .300 | .28 | *dz* |
|  | Relief vs Envy | .117 | .10 | *AKP* |
|  | Relief vs None | **.035** | .17 | *AKP* |
|  | Relief vs Disdain | **.004** | .12 | *AKP* |
|  | Relief vs Disgust | **.002** | .14 | *AKP* |
|  | Pride vs Joy | 1.000 | .05 | *dz* |
|  | Pride vs Anger | .993 | .10 | *dz* |
|  | Pride vs Happiness | .975 | .13 | *dz* |
|  | Pride vs Satisfaction | .975 | .14 | *dz* |
|  | Pride vs Envy | .825 | .20 | *dz* |
|  | Pride vs None | .504 | .21 | *dz* |
|  | Pride vs Disdain | .117 | .33 | *dz* |
|  | Pride vs Disgust | .056 | .37 | *dz* |
|  | Joy vs Anger | 1.000 | .06 | *dz* |
|  | Joy vs Happiness | 1.000 | .09 | *dz* |
|  | Joy vs Satisfaction | 1.000 | .08 | *dz* |
|  | Joy vs Envy | .975 | .13 | *dz* |
|  | Joy vs None | .825 | .17 | *dz* |
|  | Joy vs Disdain | .300 | .28 | *dz* |
|  | Joy vs Disgust | .160 | .33 | *dz* |
|  | Anger vs Happiness | 1.000 | .02 | *dz* |
|  | Anger vs Satisfaction | 1.000 | .02 | *dz* |
|  | Anger vs Envy | 1.000 | .06 | *dz* |
|  | Anger vs None | .993 | .11 | *dz* |
|  | Anger vs Disdain | .720 | .23 | *dz* |
|  | Anger vs Disgust | .504 | .31 | *dz* |
|  | Happiness vs Satisfaction | 1.000 | .00 | *dz* |
|  | Happiness vs Envy | 1.000 | .06 | *dz* |
|  | Happiness vs None | .998 | .10 | *dz* |
|  | Happiness vs Disdain | .825 | .22 | *dz* |
|  | Happiness vs Disgust | .623 | .26 | *dz* |
|  | Satisfaction vs Envy | 1.000 | .06 | *dz* |
|  | Satisfaction vs None | .998 | .10 | *dz* |
|  | Satisfaction vs Disdain | .825 | .21 | *dz* |
|  | Satisfaction vs Disgust | .623 | .26 | *dz* |
|  | Envy vs None | 1.000 | .05 | *dz* |
|  | Envy vs Disdain | .975 | .17 | *dz* |
|  | Envy vs Disgust | .889 | .21 | *dz* |
|  | None vs Disdain | 1.000 | .10 | *dz* |
|  | None vs Disgust | .993 | .15 | *dz* |
|  | Disdain vs Disgust | 1.000 | .07 | *dz* |
| **SHAME** (N=126) | Pride vs None | .999 | .10 | *AKP* |
|  | Pride vs Disgust | .998 | .08 | *AKP* |
|  | Pride vs Relief | .932 | .02 | *AKP* |
|  | Pride vs Anger | .871 | .15 | *dz* |
|  | Pride vs Happiness | .672 | .18 | *dz* |
|  | Pride vs Hope | .672 | .06 | *AKP* |
|  | Pride vs Joy | .436 | .23 | *dz* |
|  | Pride vs Satisfaction | .117 | .02 | *AKP* |
|  | Pride vs Curiosity | .077 | .06 | *AKP* |
|  | Pride vs Envy | **.007** | .08 | *AKP* |
|  | None vs Disgust | 1.000 | .01 | *dz* |
|  | None vs Disdain | 1.000 | .03 | *dz* |
|  | None vs Relief | 1.000 | .05 | *dz* |
|  | None vs Anger | .999 | .07 | *dz* |
|  | None vs Happiness | .990 | .10 | *dz* |
|  | None vs Hope | .990 | .10 | *dz* |
|  | None vs Joy | .932 | .13 | *dz* |
|  | None vs Satisfaction | .551 | .19 | *dz* |
|  | None vs Curiosity | .436 | .21 | *dz* |
|  | None vs Envy | .077 | .32 | *dz* |
|  | Disgust vs Disdain | 1.000 | .02 | *dz* |
|  | Disgust vs Relief | 1.000 | .04 | *dz* |
|  | Disgust vs Anger | 1.000 | .06 | *dz* |
|  | Disgust vs Happiness | .998 | .08 | *dz* |
|  | Disgust vs Hope | .998 | .09 | *dz* |
|  | Disgust vs Joy | .971 | .11 | *dz* |
|  | Disgust vs Satisfaction | .672 | .19 | *dz* |
|  | Disgust vs Curiosity | .551 | .21 | *dz* |
|  | Disgust vs Envy | .117 | .32 | *dz* |
|  | Disdain vs Relief | 1.000 | .03 | *dz* |
|  | Disdain vs Anger | 1.000 | .05 | *dz* |
|  | Disdain vs Happiness | .999 | .07 | *dz* |
|  | Disdain vs Hope | .999 | .08 | *dz* |
|  | Disdain vs Joy | .990 | .11 | *dz* |
|  | Disdain vs Satisfaction | .781 | .17 | *dz* |
|  | Disdain vs Curiosity | .672 | .19 | *dz* |
|  | Disdain vs Envy | .172 | .30 | *dz* |
|  | Relief vs Anger | 1.000 | .01 | *dz* |
|  | Relief vs Happiness | 1.000 | .05 | *dz* |
|  | Relief vs Hope | 1.000 | .05 | *dz* |
|  | Relief vs Joy | .999 | .08 | *dz* |
|  | Relief vs Satisfaction | .932 | .17 | *dz* |
|  | Relief vs Curiosity | .871 | .18 | *dz* |
|  | Relief vs Envy | .332 | .27 | *dz* |
|  | Anger vs Happiness | 1.000 | .03 | *dz* |
|  | Anger vs Hope | 1.000 | .03 | *dz* |
|  | Anger vs Joy | 1.000 | .06 | *dz* |
|  | Anger vs Satisfaction | .971 | .13 | *dz* |
|  | Anger vs Curiosity | .932 | .15 | *dz* |
|  | Anger vs Envy | .436 | .26 | *dz* |
|  | Happiness vs Hope | 1.000 | .00 | *dz* |
|  | Happiness vs Joy | 1.000 | .04 | *dz* |
|  | Happiness vs Satisfaction | .998 | .11 | *dz* |
|  | Happiness vs Curiosity | .990 | .13 | *dz* |
|  | Happiness vs Envy | .672 | .22 | *dz* |
|  | Hope vs Joy | 1.000 | .03 | *dz* |
|  | Hope vs Satisfaction | .998 | .10 | *dz* |
|  | Hope vs Curiosity | .990 | .14 | *dz* |
|  | Hope vs Envy | .672 | .25 | *dz* |
|  | Joy vs Satisfaction | 1.000 | .07 | *dz* |
|  | Joy vs Curiosity | .999 | .10 | *dz* |
|  | Joy vs Envy | .871 | .20 | *dz* |
|  | Satisfaction vs Curiosity | 1.000 | .02 | *dz* |
|  | Satisfaction vs Envy | .998 | .13 | *dz* |
|  | Curiosity vs Envy | .999 | .12 | *dz* |
| **GUILT** (N=127) | None vs Hope | 1.000 | 001 | *AKP* |
|  | None vs Anger | .996 | .07 | *AKP* |
|  | None vs Disgust | .956 | .12 | *AKP* |
|  | None vs Relief | .741 | .13 | *AKP* |
|  | None vs Satisfaction | .394 | .13 | *AKP* |
|  | None vs Disdain | .075 | .13 | *AKP* |
|  | None vs Happiness | **.034** | .13 | *AKP* |
|  | None vs Envy | **.034** | .13 | *AKP* |
|  | None vs Curiosity | **.021** | .13 | *AKP* |
|  | None vs Pride | **.014** | .13 | *AKP* |
|  | None vs Joy | **.002** | .13 | *AKP* |
|  | Hope vs Anger | .999 | .02 | *AKP* |
|  | Hope vs Disgust | .985 | .10 | *dz* |
|  | Hope vs Relief | .832 | .14 | *dz* |
|  | Hope vs Satisfaction | .510 | .02 | *AKP* |
|  | Hope vs Disdain | .107 | .08 | *AKP* |
|  | Hope vs Happiness | **.049** | .04 | *AKP* |
|  | Hope vs Envy | **.049** | .02 | *AKP* |
|  | Hope vs Curiosity | **.034** | .40 | *dz* |
|  | Hope vs Pride | **.021** | .08 | *AKP* |
|  | Hope vs Joy | **.003** | .08 | *AKP* |
|  | Anger vs Disgust | 1.000 | .03 | *dz* |
|  | Anger vs Relief | .999 | .07 | *dz* |
|  | Anger vs Satisfaction | .956 | .02 | *AKP* |
|  | Anger vs Disdain | .510 | .22 | *dz* |
|  | Anger vs Happiness | .305 | .23 | *dz* |
|  | Anger vs Envy | .305 | .24 | *dz* |
|  | Anger vs Curiosity | .220 | .27 | *dz* |
|  | Anger vs Pride | .161 | .02 | *AKP* |
|  | Anger vs Joy | **.034** | .37 | *dz* |
|  | Disgust vs Relief | 1.000 | .04 | *dz* |
|  | Disgust vs Satisfaction | .996 | .08 | *dz* |
|  | Disgust vs Disdain | .741 | .21 | *dz* |
|  | Disgust vs Happiness | .510 | .20 | *dz* |
|  | Disgust vs Envy | .510 | .20 | *dz* |
|  | Disgust vs Curiosity | .394 | .22 | *dz* |
|  | Disgust vs Pride | .305 | .25 | *dz* |
|  | Disgust vs Joy | .075 | .33 | *dz* |
|  | Relief vs Satisfaction | 1.000 | .06 | *dz* |
|  | Relief vs Disdain | .956 | .12 | *dz* |
|  | Relief vs Happiness | .832 | .18 | *dz* |
|  | Relief vs Envy | .832 | .18 | *dz* |
|  | Relief vs Curiosity | .741 | .18 | *dz* |
|  | Relief vs Pride | .622 | .20 | *dz* |
|  | Relief vs Joy | .220 | .32 | *dz* |
|  | Satisfaction vs Disdain | .999 | .08 | *dz* |
|  | Satisfaction vs Happiness | .985 | .15 | *dz* |
|  | Satisfaction vs Envy | .985 | .15 | *dz* |
|  | Satisfaction vs Curiosity | .956 | .14 | *dz* |
|  | Satisfaction vs Pride | .911 | .16 | *dz* |
|  | Satisfaction vs Joy | .510 | .27 | *dz* |
|  | Disdain vs Happiness | 1.000 | .04 | *dz* |
|  | Disdain vs Envy | 1.000 | .04 | *dz* |
|  | Disdain vs Curiosity | 1.000 | .06 | *dz* |
|  | Disdain vs Pride | 1.000 | .08 | *dz* |
|  | Disdain vs Joy | .956 | .17 | *dz* |
|  | Happiness vs Envy | 1.000 | .00 | *dz* |
|  | Happiness vs Curiosity | 1.000 | .02 | *dz* |
|  | Happiness vs Pride | 1.000 | .04 | *dz* |
|  | Happiness vs Joy | .996 | .19 | *dz* |
|  | Envy vs Curiosity | 1.000 | .02 | *dz* |
|  | Envy vs Pride | 1.000 | .04 | *dz* |
|  | Envy vs Joy | .996 | .15 | *dz* |
|  | Curiosity vs Pride | 1.000 | .02 | *dz* |
|  | Curiosity vs Joy | .999 | .12 | *dz* |
|  | Pride vs Joy | 1.000 | .09 | *dz* |

*Note.* *P*-values were adjusted within each family using the Westfall–Young maxT procedure (FWER, two-sided, *α* = .05). **Bold = significant**, regular = not significant.

**Table S2**

*Robustness and internal replicability analyses on the main results.*

| Groups | |  | Sensitivity to sample composition | | | Estimate Variability | Sensitivity to  data perturbations | | **Internal Replicability** | |  | |
| --- | --- | --- | --- | --- | --- | --- | --- | --- | --- | --- | --- | --- |
| **ESI** | **Use** | **Original percentage** | | **Jackknife** | **Bootstrap** | | | **Multiverse** | | **Split half** | | **Conclusions** | |
| All | general | 90.0 | | M = 90.0 SE = 2.6  IC(95%) = [84.8, 95.2]  Bias = 0 | M = 90.0 SD = 2.6  IC(95%) = [84.6, 94.8]  Bias = .02 | | | M = 87.5 SD = 1.9  IC(95%) = [83.8, 91.2] | | M = 90.0 SD = 2.8  IC(95%) = [84.6, 95.4]  Replicability rate = .92 | | High robustness  High internal replicability | |
| For Positive ER (NESIP, PESIP) | general | 56.9 | | M = 56.9  SE = 4.4  IC(95%) = [48.4, 65.5]  Bias = 0 | M = 57.0 SD = 4.3  IC(95%) = [48.5, 65.4]  Bias = .03 | | | M = 59.8 SD = 3.2  IC(95%) = [53.4, 66.2] | | M = 56.9 SD = 4.4  IC(95%) = [48.4, 64.7]  Replicability rate = .75 | | High robustness  Moderate-to-high internal replicability | |
| For Negative ER emotion  (PESIN, NESIN) | general | 87.7 | | M = 87.7 SE = 2.9  IC(95%) = [82.0, 93.4]  Bias = 0 | M = 87.7 SD = 2.9  IC(95%) = [81.8, 93.1]  Bias = -.04 | | | M = 85.4 SD = 2.1  IC(95%) = [81.9, 89.2] | | M = 87.7 SD = 2.9  IC(95%) = [82.1, 93.7]  Replicability rate = .92 | | High robustness  High internal replicability | |
| PESIN | general | 83.8 | | M = 83.8 SE = 3.2  IC(95%) = [77.5, 90.2]  Bias = 0 | M = 83.9 SD = 3.2  IC(95%) = [77.4, 90.0]  Bias = .01 | | | M = 81.3 SD = 2.5  IC(95%) = [76.9, 86.2] | | M = 83.9 SD = 3.4  IC(95%) = [77.6, 90.5]  Replicability rate = .83 | | High robustness  High internal replicability | |
| PESIN | Almost never | 16.2 | | M = 16.2 SE = 3.2  IC(95%) = [9.8, 22.5]  Bias = 0 | M = 16.2 SD = 3.2  IC(95%) = [10.0, 23.1]  Bias = .02 | | | M = 18.3 SD = 1.9  IC(95%) = [14.6, 21.5] | | M = 16.2 SD = 3.1  IC(95%) = [10.8. 21.5]  Replicability rate = .88 | | High robustness  High internal replicability | |
| PESIN | Sometimes | 27.7 | | M = 27.7 SE = 3.9  IC(95%) = [20.0, 35.4]  Bias = 0 | M = 27.7 SD = 3.9  IC(95%) = [20.0, 35.4]  Bias = .02 | | | M = 22.3 SD = 3.0  IC(95%) = [16.5, 27.3] | | M = 27.7 SD = 3.8  IC(95%) = [20.0, 35.4]  Replicability rate = .82 | | High robustness  High internal replicability | |
| PESIN | Regularly | 29.2 | | M = 29.2 SE = 4.0  IC(95%) = [21.4, 37.1]  Bias = 0 | M = 29.2 SD = 4.0  IC(95%) = [21.5, 36.9]  Bias = -.04 | | | M = 27.5 SD = 3.7  IC(95%) = [21.1, 35.4] | | M = 29.2 SD = 3.8  IC(95%) = [23.1, 35.4]  Replicability rate = .86 | | High robustness  High internal replicability | |
| PESIN | Often | 22.3 | | M = 22.3 SE = 3.7 IC(95%) = [15.1, 29.5] Bias = 0 | M = 22.3 SD = 3.6 IC(95%) = [15.4, 30.0] Bias = .04 | | | M = 19.9 SD = 2.8 IC(95%) = [13.4, 25.0] | | M = 22.3 SD = 4.1 IC(95%) = [15.4, 29.2] Replicability rate = .74 | | High robustness  Moderate internal replicability | |
| PESIN | Almost always | 4.6 | | M = 4.6 SE = 1.8 IC(95%) = [1.0, 8.2] Bias = 0 | M = 4.6 SD = 1.9 IC(95%) = [1.5, 8.5] Bias = -.03 | | | M = 10.8 SD = 2.3 IC(95%) = [7.3, 15.8] | | M = 4.6 SD = 1.7 IC(95%) = [1.5, 7.7] Replicability rate = 1 | | Moderate-to-high robustness  High internal replicability | |
| For sadness | Hope | 62.7 | | M = 62.7 SE = 4.3 IC(95%) = [54.2, 71.2] Bias = 0 | M = 62.7 SD = 3.3 IC(95%) = [56.2, 69.3] Bias = -.03 | | | M = 53.8 SD = 3.0 IC(95%) = [48.0, 58.7] | | M = 62.7 SD = 4.2 IC(95%) = [54.0, 71.4] Replicability rate = .78 | | Moderate-to-high robustness  Moderate-to-high internal replicability | |
| For sadness | Joy | 41.3 | | M = 41.3  SE = 4.4 IC(95%) = [32.6, 49.9] Bias = 0 | M = 41.3 SD = 3.3 IC(95%) = [34.6, 47.6] Bias = 0 | | | M = 36.8 SD = 3.3 IC(95%) = [31.0, 42.5] | | M = 41.3 SD = 4.4 IC(95%) = [33.3, 49.2] Replicability rate = .77 | | Moderate-to-high robustness  Moderate-to-high internal replicability | |
| For sadness | Happiness | 35.7 | | M = 35.7 SE = 4.3 IC(95%) = [27.3, 44.1] Bias = 0 | M = 35.7 SD = 3.3 IC(95%) = [29.3, 42.2] Bias = -.01 | | | M = 30.3 SD = 3.1 IC(95%) = [23.4, 35.7] | | M = 35.7 SD = 4.3 IC(95%) = [27.0, 44.4] Replicability rate = .74 | | Moderate-to-high robustness  Moderate internal replicability | |
| For fear | Hope | 44.4 | | M = 44.4 SE = 4.4 IC(95%) = [35.7, 53.2] Bias = 0 | M = 44.4 SD = 3.4 IC(95%) = [37.7, 51.2] Bias = -.06 | | | M = 37.7 SD = 2.6 IC(95%) = [31.7, 42.1] | | M = 44.4 SD = 4.7 IC(95%) = [34.9, 54.0] Replicability rate = .77 | | Moderate-to-high robustness  Moderate-to-high internal replicability | |
| For fear | Curiosity | 29.4 | | M = 29.4 SE = 4.1 IC(95%) = [21.4, 37.3] Bias = 0 | M = 29.4 SD = 3.1 IC(95%) = [23.2, 35.4] Bias = .02 | | | M = 25.4 SD = 2.1 IC(95%) = [21.4, 29.4] | | M = 29.4 SD = 4.2 IC(95%) = [20.6, 38.1] Replicability rate = .72 | | Moderate-to-high robustness  Moderate internal replicability | |
| For fear | Relief | 27.0 | | M = 27.0 SE = 4.0 IC(95%) = [19.2, 34.8] Bias = 0 | M = 27.0 SD = 3.0 IC(95%) = [21.0, 32.9] Bias = -.01 | | | M = 21.9 SD = 3.1 IC(95%) = [16.7, 27.4] | | M = 27.0 SD = 4.0 IC(95%) = [19.0, 34.9] Replicability rate = .84 | | Moderate-to-high robustness  High internal replicability | |

| Groups | |  |  | | Sensitivity to sample composition | | | | Estimate Variability | | Sensitivity to data perturbations | **Internal Replicability** | | | |  |
| --- | --- | --- | --- | --- | --- | --- | --- | --- | --- | --- | --- | --- | --- | --- | --- | --- |
| **Group1** | **Group2** | **Mean 1** | | **Mean 2** | | ***p*** | ***AKP*** | **Jackknife** | | **Bootstrap** | | | **Multiverse** | | **Split half** | | | **Conclusions** |
| Negative  ER  (PESIN, NESIN) | Positive  ER  (NESIP, PESIP) | 2.04 | | 1.53 | | < .001 | .72 | M = .51 SE = .06  IC(95%) = [.39, .63]  Bias = 0 | | M = .51 SD = .06  IC(95%) = [.40, .63]  Bias = 0 | | | M = .51 SD = .01  IC(95%) = [.50, .53] | | M = .51 SD = .06  IC(95%) = [.40, .63]  Replicability rate = 1 | | | High robustness  High internal replicability |
| PESIN | NESIP,  NESIN, PESIP | 2.43 | | 1.57 | | < .001 | .67 | M = .86 SE = .10  IC(95%) = [.67, 1.05]  Bias = 0 | | M = .86 SD = .10  IC(95%) = [.67, 1.06]  Bias = 0 | | | M = .86 SD = .01  IC(95%) = [.84, .89] | M = .86 SD = .10  IC(95%) = [.67, 1.05]  Replicability rate = 1 | | | | High robustness  High internal replicability |
| Hope for SR | All Emotions except Hope for SR | .63 | | .20 | | < .001 | .70 | M = .43 SE = .04  IC(95%) = [.35, .51]  Bias = 0 | | M = .43 SD = .04  IC(95%) = [.35, .51]  Bias = 0 | | | M = .43 SD = .01  IC(95%) = [.42, .44] | M = .43 SD = .04  IC(95%) = [.34, .52]  Replicability rate = 1 | | | | High robustness  High internal replicability |
| Hope for SR | Joy for SR | .63 | | .41 | | < .001 | .29 | M = .21 SE = .06  IC(95%) = [.10, .32]  Bias = 0 | | M = .21 SD = .06  IC(95%) = [.10, .33]  Bias = 0 | | | M = .22 SD = .01  IC(95%) = [.20, .23] | M = .21 SD = .05  IC(95%) = [.11, .32]  Replicability rate = .82 | | | | Moderate-to-high robustness  High internal replicability |
| Hope for SR | Happiness for SR | .63 | | .36 | | < .001 | .32 | M = .27 SE = .05  IC(95%) = [.17, .37]  Bias = 0 | | M = .27 SD = .05  IC(95%) = [.17, .37]  Bias = 0 | | | M = .27 SD = .01  IC(95%) = [.25, .28] | M = .27 SD = .05  IC(95%) = [.16, .38]  Replicability rate = .98 | | | | High robustness  High internal replicability |
| Hope for FR | All Emotions except Hope for FR | .44 | | .15 | | < .001 | .34 | M = .29 SE = .04  IC(95%) = [.20, .38]  Bias = 0 | | M = .29 SD = .04  IC(95%) = [.20, .38]  Bias = 0 | | | M = .29 SD = .01  IC(95%) = [.28, .30] | M = .29 SD = .04  IC(95%) = [.21, .37]  Replicability rate = 1 | | | | High robustness  High internal replicability |
| Hope for FR | Relief for FR | .44 | | .27 | | .006 | .22 | M = .17 SE = .06  IC(95%) = [.07, .28]  Bias = 0 | | M = .18 SD = .06  IC(95%) = [.06, .29]  Bias = 0 | | | M = .18 SD = .01  IC(95%) = [.16, .19] | M = .17 SD = .05  IC(95%) = [.08, .27]  Replicability rate = .56 | | | | Moderate robustness  Moderate internal replicability |

| **Questionnaire** | |  |  |  | Sensitivity to sample composition | Estimate Variability | Sensitivity to data perturbations | Internal Replicability |  |
| --- | --- | --- | --- | --- | --- | --- | --- | --- | --- |
|  | **Item** | **ESI type** | **r** | **p** | **Jackknife** | **Bootstrap** | **Multiverse** | **Split half** | **Conclusions** |
| **CERQ** | Adaptive regulation | PESIN | .55 | < .001 | M = .55 SE = .06  IC(95%) = [.42, .67]  Bias = 0 | M = .55 SD = .06  IC(95%) = [.41, .66]  Bias = 0 | M = .53 SD = .01  IC(95%) = [.53, .53] | M = .55 SD = .07  IC(95%) = [.54, .56]  Replicability rate = 1 | High robustness  High internal replicability |
| **CERQ** | Non adaptive regulation | NESIN | .26 | .021 | M = .26 SE = .09  IC(95%) = [.09, .44]  Bias = 0 | M = .26 SD = .09  IC(95%) = [.08, .43]  Bias = 0 | M = .26 SD = .02  IC(95%) = [.26, .26] | M = .27 SD = .09  IC(95%) = [.26, .28]  Replicability rate = .60 | Moderate robustness  Moderate internal replicability |
| **CERQ** | Non adaptive regulation | PESIP | .25 | .032 | M = .25 SE = .10  IC(95%) = [.05, .45]  Bias = 0 | M = .25 SD = .10  IC(95%) = [.05, .44]  Bias = 0 | M = .24 SD = .02  IC(95%) = [.24, .25] | M = .25 SD = .11  IC(95%) = [.24, .26]  Replicability rate = .54 | Moderate robustness  Moderate-to-low internal replicability |
| **CERQ** | Non adaptive regulation | NESIP | .34 | .001 | M = .34 SE = .09  IC(95%) = [.16, .52]  Bias = -.01 | M = .33 SD = .09  IC(95%) = [.16, .49]  Bias = 0 | M = .33 SD = .02  IC(95%) = [.33, .33] | M = .33 SD = .09  IC(95%) = [.32, .35]  Replicability rate = .82 | High robustness  High internal replicability |
| **CERQ** | acceptance | PESIN | .45 | < .001 | M = .45 SE = .07  IC(95%) = [.31, .58]  Bias = 0 | M = .44 SD = .07  IC(95%) = [.30, .57]  Bias = 0 | M = .43 SD = .02  IC(95%) = [.43, .44] | M = .45 SD = .07  IC(95%) = [.44, .46]  Replicability rate = 1 | High robustness  High internal replicability |
| **CERQ** | Positive refocusing | PESIN | .52 | < .001 | M = .52 SE = .08  IC(95%) = [.37, .67]  Bias = 0 | M = .52 SD = .07  IC(95%) = [.36, .65]  Bias = 0 | M = .51 SD = .02  IC(95%) = [.51, .51] | M = .52 SD = .08  IC(95%) = [.51, .53]  Replicability rate = 1 | High robustness  High internal replicability |
| **CERQ** | Refocus on planning | PESIN | .37 | < .001 | M = .37 SE = .08  IC(95%) = [.21, .52]  Bias = 0 | M = .36 SD = .08  IC(95%) = [.21, .51]  Bias = 0 | M = .36 SD = .02  IC(95%) = [.35, .36] | M = .37 SD = .07  IC(95%) = [.36, .38]  Replicability rate = .95 | High robustness  High internal replicability |
| **CERQ** | Positive reappraisal | PESIN | .43 | < .001 | M = .43 SE = .07  IC(95%) = [.29, .57]  Bias = 0 | M = .43 SD = .07  IC(95%) = [.29, .56]  Bias = 0 | M = .42 SD = .02  IC(95%) = [.42, .43] | M = .44 SD = .07  IC(95%) = [.43, .45]  Replicability rate = 1 | High robustness  High internal replicability |
| **CERQ** | Putting into perspective | PESIN | .28 | .007 | M = .28 SE = .10  IC(95%) = [.09, .47]  Bias = 0 | M = .28 SD = .09  IC(95%) = [.09, .45]  Bias = 0 | M = .27 SD = .02  IC(95%) = [.27, .28] | M = .28 SD = .10  IC(95%) = [.27, .29]  Replicability rate = .64 | Moderate robustness  Moderate internal replicability |
| **CERQ** | Self-blame | NESIP | .31 | .004 | M = .31 SE = .10  IC(95%) = [.11, .51]  Bias = 0 | M = .31 SD = .09  IC(95%) = [.11, .48]  Bias = 0 | M = .31 SD = .02  IC(95%) = [.30, .31] | M = .31 SD = .10  IC(95%) = [.30, .32]  Replicability rate = .75 | Moderate-to-high robustness  Moderate-to-high internal replicability |
| **CERQ** | Catastrophizing | NESIN | .31 | .004 | M = .31 SE = .09  IC(95%) = [.14, .49]  Bias = 0 | M = .31 SD = .09  IC(95%) = [.14, .48]  Bias = 0 | M = .30 SD = .02  IC(95%) = [.30, .31] | M = .32 SD = .09  IC(95%) = [.30, .33]  Replicability rate = .76 | High robustness  Moderate-to-high internal replicability |
| **CERQ** | Catastrophizing | PESIP | .33 | .001 | M = .33 SE = .09  IC(95%) = [.16, .51]  Bias = 0 | M = .33 SD = .09  IC(95%) = [.16, .49]  Bias = 0 | M = .33 SD = .02  IC(95%) = [.32, .33] | M = .33 SD = .10  IC(95%) = [.32, .34]  Replicability rate = .83 | High robustness  High internal replicability |
| **CERQ** | Catastrophizing | NESIP | .31 | .004 | M = .31 SE = .10  IC(95%) = [.11, .50]  Bias = -.01 | M = .30 SD = .10  IC(95%) = [.10, .48]  Bias = -.01 | M = .30 SD = .02  IC(95%) = [.30, .30] | M = .30 SD = .10  IC(95%) = [.29, .31]  Replicability rate = .74 | Moderate robustness  Moderate internal replicability |
|  |  |  |  |  |  |  |  |  |  |
| **DERS** | Total score | PESIN | -.36 | <.001 | M = -.36 SE = .08  IC(95%) = [-.52, .20]  Bias = 0 | M = -.36 SD = .08  IC(95%) = [-.51, -.19]  Bias = 0 | M = -.35 SD = .02  IC(95%) = [-.35, -.35] | M = -.36  SD = .09  IC(95%) = [-.37, -.35]  Replicability rate = .89 | High robustness  High internal replicability |
| **DERS** | Total score | NESIP | .43 | < .001 | M = .43 SE = .09  IC(95%) = [.26, .60]  Bias = -.01 | M = .42 SD = .08  IC(95%) = [.26, .58]  Bias = 0 | M = .42 SD = .02  IC(95%) = [.42, .42] | M = .43 SD = .09  IC(95%) = [.42, .44]  Replicability rate = .95 | High robustness  High internal replicability |
| **DERS** | Non-acceptance of emotional response | PESIN | -.22 | .029 | M = -.22 SE = .09  IC(95%) = [-.39, -.05]  Bias = 0 | M = -.22 SD = .09  IC(95%) = [-.38, -.04]  Bias = 0 | M = -.22 SD = .02  IC(95%) = [-.22, -.21] | M = -.22 SD = .09  IC(95%) = [-.23, -.21]  Replicability rate = .35 | Moderate robustness  Low internal replicability |
| **DERS** | Non-acceptance of emotional response | NESIP | .47 | < .001 | M = .47  SE = .09  IC(95%) = [.30, .65]  Bias = 0 | M = .47 SD = .09  IC(95%) = [.29, .63]  Bias = 0 | M = .46 SD = .02  IC(95%) = [.46, .47] | M = .47 SD = .09  IC(95%) = [.46, .48]  Replicability rate = .99 | **High robustness**  **High internal replicability** |
| **DERS** | Difficulties in adopting goal-directed behaviors | PESIN | -.19 | .036 | M = -.19 SE = .09  IC(95%) = [-.37, -.02]  Bias = 0 | M = -.19 SD = .09  IC(95%) = [-.36, -.02]  Bias = 0 | M = -.19 SD = .02  IC(95%) = [-.19, -.19] | M = -.19 SD = .09  IC(95%) = [-.21, -.18]  Replicability rate = .23 | High robustness  Low internal replicability |
| **DERS** | Difficulties in controlling impulsive behaviors | PESIN | -.26 | .019 | M = -.26 SE = .08  IC(95%) = [-.41, -.10]  Bias = 0 | M = -.26 SD = .08  IC(95%) = [-.40, -.10]  Bias = 0 | M = -.25 SD = .02  IC(95%) = [-.25, -.25] | M = -.26 SD = .08  IC(95%) = [-.27, -.24]  Replicability rate = .50 | **Moderate robustness.**  **Moderate-to-low internal replicability** |
| **DERS** | Difficulties in controlling impulsive behaviors | NESIP | .34 | < .001 | M = .34 SE = .12  IC(95%) = [.11, .57]  Bias = -.01 | M = .33 SD = .11  IC(95%) = [.13, .54]  Bias = -.01 | M = .33 SD = .02  IC(95%) = [.33, .34] | M = .34 SD = .11  IC(95%) = [.33, .35]  Replicability rate = .75 | Moderate robustness  Moderate-to-high internal replicability |
| **DERS** | Lack of emotional awareness | PESIN | -.36 | < .001 | M = -.36 SE = .09  IC(95%) = [-.54, -.18]  Bias = 0 | M = -.36 SD = .09  IC(95%) = [-.52, -.17]  Bias = 0 | M = -.35 SD = .02  IC(95%) = [-.35, -.35] | M = -.36 SD = .10  IC(95%) = [-.37, -.35]  Replicability rate = .85 | High robustness  High internal replicability |
| **DERS** | Limited access to emotion regulation strategies | PESIN | -.32 | .001 | M = -.32 SE = .08  IC(95%) = [-.48, -.17]  Bias = 0 | M = -.32 SD = .08  IC(95%) = [-.47, -.17]  Bias = 0 | M = -.32 SD = .02  IC(95%) = [-.32, -.31] | M = -.33 SD = .07  IC(95%) = [-.34, -.31]  Replicability rate = .83 | High robustness  High internal replicability |
| **DERS** | Limited access to emotion regulation strategies | NESIP | .36 | < .001 | M = .36 SE = .09  IC(95%) = [.19, .53]  Bias = 0 | M = .36  SD = .08  IC(95%) = [.19, .52]  Bias = 0 | M = .35 SD = .02  IC(95%) = [.35, .35] | M = .36 SD = .08  IC(95%) = [.35, .37]  Replicability rate = .90 | High robustness  High internal replicability |
| **DERS** | Lack of emotional identification or clarity | PESIN | -.23 | .029 | M = -.23 SE = .10  IC(95%) = [-.43, -.04]  Bias = 0 | M = -.23 SD = .10  IC(95%) = [-.41, -.04]  Bias = 0 | M = -.23 SD = .02  IC(95%) = [-.23, -.23] | M = -.24 SD = .10  IC(95%) = [-.25, -.22]  Replicability rate = .42 | **Moderate robustness**  **Low internal replicability** |
| **DERS** | Lack of emotional identification or clarity | NESIP | .36 | < .001 | M = .36 SE = .08  IC(95%) = [.20, .53]  Bias = 0 | M = .36 SD = .08  IC(95%) = [.20, .52]  Bias = 0 | M = .36 SD = .02  IC(95%) = [.35, .36] | M = .37 SD = .09  IC(95%) = [.35, .38]  Replicability rate = .89 | High robustness  High internal replicability |
|  |  |  |  |  |  |  |  |  |  |
| **ERS** | Persistence | NESIP | .24 | .017 | M = .24 SE = .09  IC(95%) = [.07, .42] Bias = 0 | M = .24 SD = .09  IC(95%) = [.08, .40]  Bias = 0 | M = .24 SD = .02  IC(95%) = [.24, .25] | M = .24 SD = .09  IC(95%) = [.23, .26]  Replicability rate = .44 | **Moderate robustness**  **Low internal replicability** |
| **ERS** | Persistence | PESIN | -.24 | .020 | M = -.24 SE = .09  IC(95%) = [-.41, -.07] Bias = 0 | M = -.24 SD = .09  IC(95%) = [-.40, -.07]  Bias = 0 | M = -.24 SD = .02  IC(95%) = [-.24,-.23] | M = -.24 SD = .09  IC(95%) = [-.25, -.23]  Replicability rate = .44 | **Moderate robustness**  **Low internal replicability** |
|  |  |  |  |  |  |  |  |  |  |
| **ESQ** | outlook | PESIN | .36 | <  .001 | M = .36 SE = .07  IC(95%) = [.22, .50]  Bias = 0 | M = .36 SD = .07  IC(95%) = [.22, .50]  Bias = 0 | M = .36 SD = .02  IC(95%) = [.35, .36] | M = .36 SD = .07  IC(95%) = [.35, .37]  Replicability rate = .93 | High robustness  High internal replicability |
| **ESQ** | outlook | NESIP | -.32 | .002 | M = -.32 SE = .09  IC(95%) = [-.50, -.13] Bias = 0 | M = -.31 SD = .09  IC(95%) = [-.48, -.12] Bias = 0 | M = -.31 SD = .02  IC(95%) = [-.31, -.30] | M = -.32 SD = .09  IC(95%) = [-.33, -.31]  Replicability rate = .78 | High robustness  Moderate-to-high internal replicability |
| **ESQ** | Self-awareness | NESIP | -.32 | .002 | M = -.32 SE = .09  IC(95%) = [-.50, -.14]  Bias = 0 | M = -.32 SD = .09  IC(95%) = [-.48, -.13]  Bias = 0 | M = -.31 SD = .02  IC(95%) = [-.31, -.31] | M = -.32 SD = .09  IC(95%) = [-.33, -.31]  Replicability rate = .73 | High robustness  Moderate-to-high internal replicability |
| **ESQ** | Sensitivity to context | NESIP | -.26 | .016 | M = -.26 SE = .11  IC(95%) = [-.48, -.04]  Bias = 0 | M = -.26 SD = .10  IC(95%) = [-.45, -.06]  Bias = 0 | M = -.26 SD = .02  IC(95%) = [-.26, -.25] | M = -.26 SD = .11  IC(95%) = [-.27, -.25]  Replicability rate = .54 | Moderate robustness  Moderate-to-low internal replicability |
|  |  |  |  |  |  |  |  |  |  |
| **RIPoSt-40** | AI | NESIP | .25 | .019 | M = .25 SE = .10  IC(95%) = [.06, .45]  Bias = 0 | M = .25 SD = .09  IC(95%) = [.06, .43]  Bias = 0 | M = .25 SD = .02  IC(95%) = [.24, .25] | M = .25 SD = .10  IC(95%) = [.24, .26]  Replicability rate = .50 | Moderate robustness  Moderate-to-low internal replicability |
| **RIPoSt-40** | AI | NESIN | .23 | .039 | M = .23 SE = .11  IC(95%) = [.03, .44] Bias = 0 | M = .23 SD = .10  IC(95%) = [.03, .43] Bias = 0 | M = .23 SD = .02  IC(95%) = [.23, .24] | M = .24 SD = .10  IC(95%) = [.23, .25]  Replicability rate = .25 | Moderate robustness  Low internal replicability |
| **RIPoSt-40** | N | PESIN | -.25 | .020 | M = -.25 SE = .08  IC(95%) = [-.42, -.08] Bias = 0 | M = -.25 SD = .08  IC(95%) = [-.41, -.08] Bias = 0 | M = -.25 SD = .02  IC(95%) = [-.25, -.24] | M = -.25 SD = .08  IC(95%) = [-.26, -.24]  Replicability rate = .48 | Moderate robustness  Low internal replicability |
| **RIPoSt-40** | N | NESIP | .37 | < .001 | M = .37 SE = .09  IC(95%) = [.19, .54] Bias = 0 | M = .36 SD = .09  IC(95%) = [.18, .52] Bias = 0 | M = .36 SD = .02  IC(95%) = [.36, .36] | M = .37 SD = .09  IC(95%) = [.36, .38]  Replicability rate = .89 | High robustness  High internal replicability |
| **RIPoSt-40** | EI | PESIN | -.26 | .018 | M = -.26 SE = .08  IC(95%) = [-.42, -.10]  Bias = 0 | M = -.26 SD = .08  IC(95%) = [-.41, -.09]  Bias = 0 | M = -.25 SD = .02  IC(95%) = [-.26, -.26] | M = -.26 SD = .09  IC(95%) = [-.27, -.25]  Replicability rate = .53 | Moderate robustness  Moderate-to-low internal replicability |
|  |  |  |  |  |  |  |  |  |  |
| **NEO-FFI** | Neuroticism | PESIN | .25 | .016 | M = -.25 SE = .12  IC(95%) = [-.48, -.02]  Bias = 0 | M = -.26 SD = .11  IC(95%) = [-.46, -.04]  Bias = 0 | M = -.24 SD = .02  IC(95%) = [-.25, -.24] | M = -.26 SD = .11  IC(95%) = [-.27, -.25]  Replicability rate = .49 | Moderate robustness  Moderate-to-low internal replicability |
| **NEO-FFI** | Extraversion | NESIN | -.23 | .049 | M = -.23 SE = .09  IC(95%) = [-.41, -.06]  Bias = 0 | M = -.23 SD = .09  IC(95%) = [-.40, -.05]  Bias = 0 | M = -.23 SD = .02  IC(95%) = [-.23, -.22] | M = -.23 SD = .09  IC(95%) = [-.24, -.22]  Replicability rate = .40 | Moderate robustness  Low internal replicability |
| **NEO-FFI** | Openness | PESIN | .31 | .002 | M = .31 SE = .07  IC(95%) = [.17, .46]  Bias = 0 | M = .31 SD = .07  IC(95%) = [.15, .45]  Bias = 0 | M = .31 SD = .02  IC(95%) = [.30, .31] | M = .32 SD = .08  IC(95%) = [.30, .33]  Replicability rate = .75 | High robustness  Moderate-to-high internal replicability |
| **NEO-FFI** | Conscientiousness | PESIN | .29 | .004 | M = .29 SE = .09  IC(95%) = [.11, .47]  Bias = 0 | M = .29 SD = .09  IC(95%) = [.10, .46]  Bias = 0 | M = .29 SD = .02  IC(95%) = [.28, .29] | M = .29 SD = .10  IC(95%) = [.28, .31]  Replicability rate = .69 | Moderate-to-high robustness  Moderate internal replicability |
|  |  |  |  |  |  |  |  |  |  |
| **PAQ** | General difficulty appraising feelings (G-DAF) | NESIP | .35 | .001 | M = .35 SE = .10  IC(95%) = [.16, .54]  Bias = 0 | M = .35 SD = .09  IC(95%) = [.16, .51]  Bias = 0 | M = .34 SD = .02  IC(95%) = [.34, .34] | M = .35 SD = .09  IC(95%) = [.33, .36]  Replicability rate = .82 | High robustness  High internal replicability |
| **PAQ** | General difficulty describing feelings (G-DDF) | NESIP | .31 | .002 | M = .31  SE = .10  IC(95%) = [.12, .51]  Bias = 0 | M = .31 SD = .09  IC(95%) = [.12, .49]  Bias = 0 | M = .31 SD = .02  IC(95%) = [.30, .31] | M = .31 SD = .10  IC(95%) = [.30, .32]  Replicability rate = .66 | Moderate-to-high robustness  Moderate internal replicability |
| **PAQ** | General difficulty identifying feelings (G-DIF) | NESIP | .37 | < .001 | M = .37 SE = .09  IC(95%) = [.18, .55]  Bias = 0 | M = .37 SD = .09  IC(95%) = [.18, .53]  Bias = 0 | M = .36 SD = .02  IC(95%) = [.36, .36] | M = .37 SD = .08  IC(95%) = [.36, .38]  Replicability rate = .89 | High robustness  High internal replicability |
| **PAQ** | Externally oriented thinking (G-EOT) | NESIP | .34 | .001 | M = .34 SE = .10  IC(95%) = [.14, .54]  Bias = 0 | M = .34 SD = .10  IC(95%) = [.15, .52]  Bias = 0 | M = .33 SD = .02  IC(95%) = [.33, .33] | M = .35 SD = .10  IC(95%) = [.34, .36]  Replicability rate = .77 | High robustness  Moderate-to-high internal replicability |
| **PAQ** | Difficulty appraising negative feelings (N-DAF) | NESIP | .23 | .018 | M = .23 SE = .10  IC(95%) = [.04, .42]  Bias = 0 | M = .23 SD = .09  IC(95%) = [.04, .40]  Bias = 0 | M = .23 SD = .02  IC(95%) = [.23, .23] | M = .23 SD = .09  IC(95%) = [.22, .24]  Replicability rate = .39 | Moderate robustness  Low internal replicability |
| **PAQ** | Difficulty describing negative feelings (N-DDF) | NESIP | .20 | .033 | M = .20 SE = .10  IC(95%) = [.01, .39]  Bias = 0 | M = .20 SD = .09  IC(95%) = [.01, .37]  Bias = 0 | M = .20 SD = .02  IC(95%) = [.19, .20] | M = .20 SD = .10  IC(95%) = [.19, .21]  Replicability rate = .30 | Moderate-to-low robustness  Low internal replicability |
| **PAQ** | Difficulty identifying negative feelings (N-DIF) | NESIP | .24 | .016 | M = .24 SE = .10  IC(95%) = [.05, .43]  Bias = 0 | M = .24 SD = .09  IC(95%) = [.06, .42]  Bias = 0 | M = .24 SD = .02  IC(95%) = [.23, .24] | M = .24 SD = .09  IC(95%) = [.23, .26]  Replicability rate = .44 | Moderate robustness  Low internal replicability |
| **PAQ** | Difficulty appraising positive feelings (P-DAF) | NESIP | .41 | < .001 | M = .41 SE = .09  IC(95%) = [.23, .58]  Bias = 0 | M = .41 SD = .08  IC(95%) = [.23, .56]  Bias = 0 | M = .40 SD = .02  IC(95%) = [.40, .40] | M = .41 SD = .08  IC(95%) = [.40, .42]  Replicability rate = .95 | High robustness  High internal replicability |
| **PAQ** | Difficulty describing positive feelings (P-DDF) | NESIP | .37 | < .001 | M = .37 SE = .10  IC(95%) = [.18, .55]  Bias = 0 | M = .37 SD = .09  IC(95%) = [.18, .53]  Bias = 0 | M = .36 SD = .02  IC(95%) = [.36, .36] | M = .37 SD = .10  IC(95%) = [.36, .38]  Replicability rate = .86 | High robustness  High internal replicability |
| **PAQ** | Difficulty identifying positive feelings (P-DIF) | NESIP | .42 | < .001 | M = .42  SE = .09  IC(95%) = [.25, .59]  Bias = 0 | M = .42 SD = .08  IC(95%) = [.25, .58]  Bias = 0 | M = .41 SD = .02  IC(95%) = [.41, .41] | M = .43 SD = .09  IC(95%) = [.42, .44]  Replicability rate = .97 | High robustness  High internal replicability |
| **PAQ** | Overall alexithymia score | NESIP | .38 | < .001 | M = .38  SE = .08  IC(95%) = [.21, .55]  Bias = 0 | M = .38 SD = .08  IC(95%) = [.21, .53]  Bias = 0 | M = .37 SD = .02  IC(95%) = [.37, .37] | M = .38 SD = .09  IC(95%) = [.37, .39]  Replicability rate = .90 | High robustness  High internal replicability |
|  |  |  |  |  |  |  |  |  |  |
| **PHQ4** | Anxiety | PESIN | -.23 | .032 | M = -.23 SE = .10  IC(95%) = [-.43, -.04]  Bias = 0 | M = -.23 SD = .10  IC(95%) = [-.41, -.04]  Bias = 0 | M = -.22 SD = .02  IC(95%) = [-.23, -.22] | M = -.23 SD = .10  IC(95%) = [-.25, -.22]  Replicability rate = .34 | Moderate robustness  Low internal replicability |
| **PHQ4** | Anxiety | NESIP | .24 | .020 | M = .24 SE = .09  IC(95%) = [.06, .42]  Bias = 0 | M = .24 SD = .09  IC(95%) = [.06, .41]  Bias = 0 | M = .24 SD = .02  IC(95%) = [.23, .24] | M = .24 SD = .09  IC(95%) = [.23, .25]  Replicability rate = .40 | Moderate robustness  Low internal replicability |
| **PHQ4** | Depression | NESIN | .28 | .009 | M = .28 SE = .10  IC(95%) = [.07, .48]  Bias = 0 | M = .28 SD = .10  IC(95%) = [.08, .46]  Bias = 0 | M = .27 SD = .02  IC(95%) = [.27, .28] | M = .28 SD = .10  IC(95%) = [.27, .29]  Replicability rate = .53 | Moderate robustness  Moderate-to-low internal replicability |
| **PHQ4** | Depression | NESIP | .22 | .024 | M = .22 SE = .10  IC(95%) = [.02, .41] Bias = 0 | M = .22 SD = .09  IC(95%) = [.02, .40] Bias = 0 | M = .22 SD = .02  IC(95%) = [.21, .22] | M = .22 SD = .10  IC(95%) = [.20, .23]  Replicability rate = .34 | Moderate-to-low robustness  Low internal replicability |

*Note.**P*-values were adjusted within each family using the Westfall–Young maxT procedure (FWER, two-sided, *α* = .05). PESIN stands for Positive ESI for Negative ER. NESIP for Negative ESI for Positive ER. NESIN for Negative ESI for Negative ER. PESIP for Positive ESI for Positive ER. Robustness’ conclusions were judged according to the variation coefficient (High VC < 25%, Moderate-to-high VC = 25- 35%, Moderate VC = 36-45%, Moderate-to-low VC = 46-55%, Low VC > 55%). As there are no established thresholds for psychology, we build from the medical imaging field, in which they interpreted CVs above 20% as questionable validity. However, behavioral science exhibits much greater variability; thus, we have elevated our criteria (Bogdanov et al., 2024). Conclusions also relied on relative bias (High < 5%, Moderate = 5-10%, Low > 10%), confidence intervals, and internal replicability rate (High > 85%, Moderate-to-high = 85-75%, Moderate = 74-55%, Moderate-to-low= 54-45%, Low < 45%). While no fixed standards exist, we adopted a pragmatic framework commonly used in psychological methods.

**Table S3**

*Characteristics of various emotions’ components.*

*
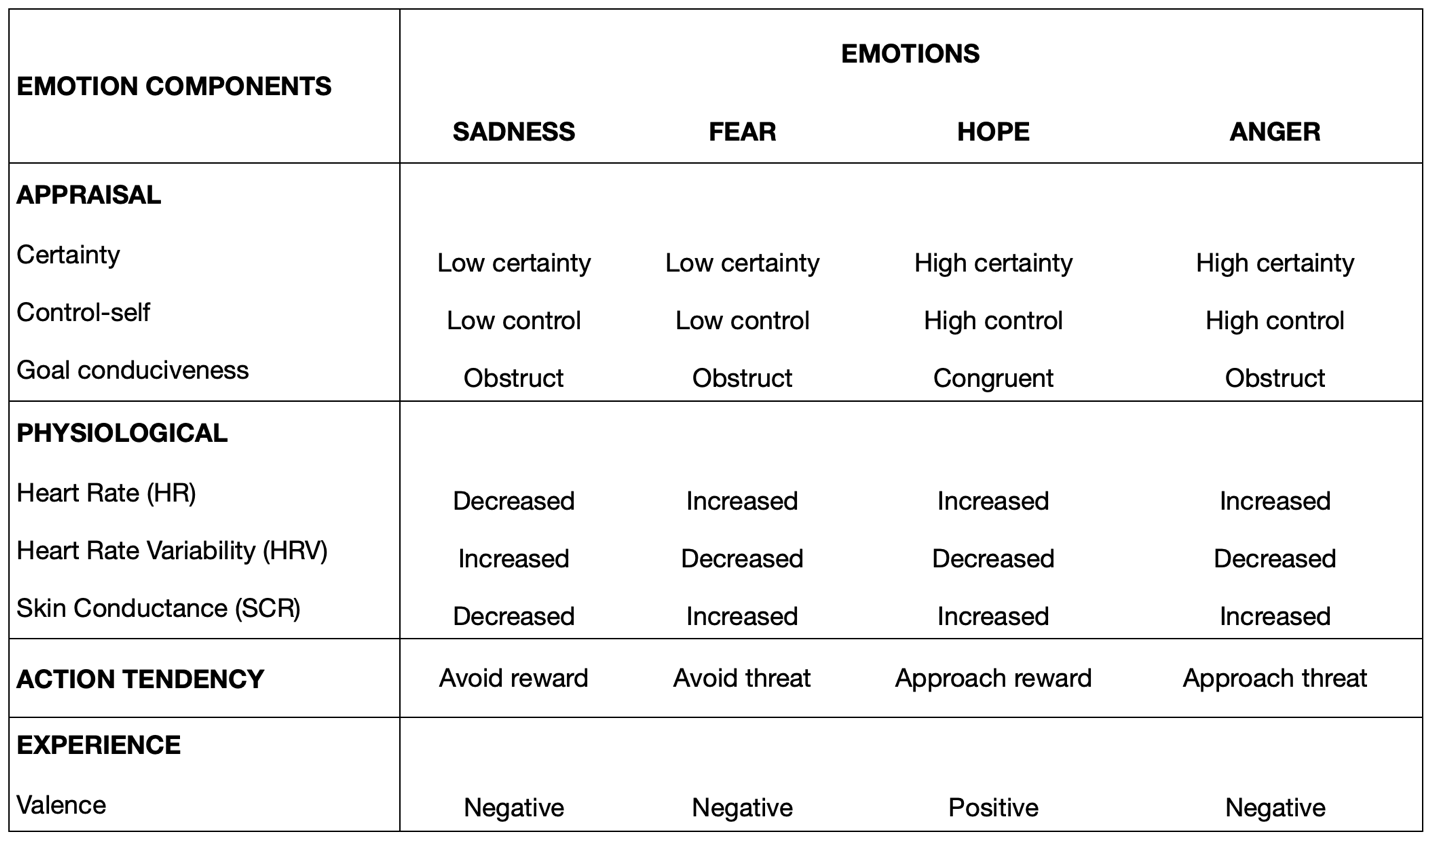
*

## *Note*. These characteristics are not comprehensive (Ho et al., 2023; Kreibig, 2010; O’toole & Mikkelsen, 2021; Yeo & Ong, 2024; Kiuru et al., 2022a; Kiuru et al., 2022b). Facial expressivity is not reported here owing to insufficient data on emotion-specific expression patterns, particularly for hope. Building on findings for PESIN and the role of hope, we propose the Oppositional Emotion Regulation Model (OERM). Grounded in the Component Process Model (CPM; Scherer, 2005), OERM suggests that individuals deliberately induce emotions whose core components oppose those of the emotion to be regulated, reshaping the original experience. For instance, hope and sadness show opposed appraisals: hope arises when obstructed goals turn resolvable (also high control), whereas sadness reflects irrevocable goal loss (also low control). These contrasts fit the emotional blunting hypothesis (Winterich et al., 2010), which posits that opposing appraisals reduce intensity, and Ellsworth’s (1991) view that transitions between emotions depend on shared versus opposed appraisals. Beyond appraisal, hope and sadness also oppose in valence, action tendencies, and physiology (increased vs. decreased HRV/SCR), supporting mutual neutralization. Comparable contrasts exist between fear and hope, and sadness and anger (Zhan et al., 2015; Lutz & Krahé, 2018). The OERM thus offers a framework explaining how co-activated, opposed emotions regulate one another through contrasts in appraisal, valence, and physiology. It provides a promising basis for future research on emotion interaction.

**References**

Blanchet, J., Li, J., Lin, S., & Zhang, X. (2024). Distributionally robust optimization and robust statistics. arXiv preprint arXiv:2401.14655. <https://doi.org/10.48550/arXiv.2401.14655>

Bogdanov, M., Scott, J. N., Esfand, S. M., Boyle, B. W., Lees, T., Li, M., Woronko, S. E., Linton, S. R., Miller, C., Li, S., Bolton, P., Meisner, R. C., & Pizzagalli, D. A. (2024). Test-retest reliability and repeatability of behavioral and electrophysiological markers in an Eriksen Flanker task. *bioRxiv*. [https://doi.org/1.1101/2024.09.28.615624](https://doi.org/10.1101/2024.09.28.615624)

Ellsworth, P. C. (1991). Some implications of cognitive appraisal theories of emotion. In K. T. Strongman (Ed.), International review of studies on emotion (Vol. 1, pp. 143–161). Wiley.

Ho, Y. W. B., Bressington, D., Tsang, M. Y., Pang, H. H., Li, Y., & Wong, W. K. (2023). Can heart rate variability be a bio-index of hope? A pilot study. *Frontiers in psychiatry*, *14*, 1119925. <https://doi.org/10.3389/fpsyt.2023.1119925>

Kharabian Masouleh, S., Eickhoff, S. B., Hoffstaedter, F., Genon, S., & Alzheimer's Disease Neuroimaging Initiative. (2019). Empirical examination of the replicability of associations between brain structure and psychological variables. elife, 8, e43464. <https://doi.org/10.7554/eLife.43464>

Kiuru, N., Malmberg, L. E., Eklund, K., Penttonen, M., Ahonen, T., & Hirvonen, R. (2022a). How are learning experiences and task properties associated with adolescents’ emotions and psychophysiological states?. Contemporary Educational Psychology, 71, 102095. <https://doi.org/10.1016/j.cedpsych.2022.102095>

Kiuru, N., Trög, A. S., Pasanen, M., Tourunen, A., Mikkonen, J., Ahonen, T., & Penttonen, M. (2022b). Associations Between Adolescents' Subjectively Experienced Emotions and Psychophysiological Reactions in Achievement Situations. Merrill-Palmer Quarterly, 68(1), 39-71.

Koul, A., Becchio, C., & Cavallo, A. (2018). Cross-validation approaches for replicability in psychology. Frontiers in psychology, 9, 1117. <https://doi.org/10.3389/fpsyg.2018.01117>

Kreibig, S. D. (2010). Autonomic nervous system activity in emotion: A review. Biological psychology, 84(3), 394-421. <https://doi.org/10.1016/j.biopsycho.2010.03.010>

Lutz, J., & Krahé, B. (2018). Inducing sadness reduces anger-driven aggressive behavior: A situational approach to aggression control. Psychology of Violence, 8(3), 358. <https://doi.org/10.1037/vio0000167>

McIntosh, A. (2016). The Jackknife estimation method. arXiv preprint arXiv:1606.00497. <https://doi.org/10.48550/arXiv.1606.00497>

O’Toole, M. S., & Mikkelsen, M. B. (2021). Developing a non‐verbal, self‐report assessment tool of action tendencies: The Depicted Action Tendencies (DAT) instrument. Scandinavian Journal of Psychology, 62(3), 289-300. <https://doi.org/10.1111/sjop.12710>

Scherer, K. R. (2005). What are emotions? And how can they be measured?. Social science information, 44(4), 695-729. <https://doi.org/10.1177/0539018405058216>

Simonsohn, U., Simmons, J. P., & Nelson, L. D. (2020). Specification curve analysis. Nature human behaviour, 4(11), 1208-1214. <https://doi.org/10.1038/s41562-020-0912-z>

Steegen, S., Tuerlinckx, F., Gelman, A., & Vanpaemel, W. (2016). Increasing transparency through a multiverse analysis. Perspectives on Psychological Science, 11(5), 702-712. <https://doi.org/10.1177/1745691616658637>

Winterich, P. K., Han, S., & Lerner, S. J. (2010). Now That I’m Sad, It’s Hard to Be Mad: The Role of Cognitive Appraisals in Emotional Blunting. Personality and Social Psychology Bulletin, 36(11), 1467-1483. <https://doi.org/10.1177/0146167210384710>

Yeo, G. C., & Ong, D. C. (2024). Associations between cognitive appraisals and emotions: A meta-analytic review. Psychological Bulletin, 150(12), 1440–1471. <https://doi.org/10.1037/bul0000452>

Zhan, J., Ren, J., Fan, J., & Luo, J. (2015). Distinctive effects of fear and sadness induction on anger and aggressive behavior. Frontiers in Psychology, 6, 725. <https://doi.org/10.3389/fpsyg.2015.00725>
